# Supplementary material
Source: publisher figshare collection journal article supplement (https://plos.figshare.com/articles/dataset/_/8232026)
Supplement: Supplementary file 1 [file 1 › pone.0217262.s002.xlsx]

## Sheet: Sheet1
S 2. Appendix: Checklist for fulfillment of consolidated criteria for reporting qualitative studies (COREQ)
Domain 1: Research team and reflexivity					Page location in manuscript
1	Interviewer/facilitator				Page 6. (Sub-section: Research Team)
2	Credentials
3	Occupation
4	Gender
5	Experience and training
Relationship with particiapants
6	Relationship established
7	Participant knowledge of the interviewer
8	Interviewer characteristics
Domain 2: Study design
Theoretical framework
9	Methodological orientation and theory				Page 7. (Sub-section: Theoretical framework)
Participant selection
10	Sampling				Page 8. (Sub-section: Sampling)
11	Method of approach
12	Sample size				Page 8 to 9. (Sub-section: Sampling size)
13	Non-participation
Setting
14	Setting of data collection				Page 9. (Sub-section: Setting of data collection)
15	Presence of non-participants
16	Description of sample				Page 11. (Sub-section: Characteristics of the study sample)
Data collection
17	Interview guide				Page 9. (Sub-section: Data collection)
18	Repeat interview
19	Audio/visual recording
20	Field notes Duration
21	Duration
22	Data saturation				Page 8 to 9. (Sub-section: Sampling size)
23	Transcripts returned to participants				Page 9. (Sub-section: Data collection)
Domain 3: analysis and findings
Data analysis
24	Number of data coders				Page 10. (Sub-section: Data analysis)
25	Description of coding
26	Derivation of themes
27	Soft ware for data managment
28	Participant checking/feedback
Reporting
29	Quotations presented				Page 11 to 17 (Sub-sections: Different kinds of fevers to Delays at public health facilities
30	Data and findings consistent
31	Clarity of major themes				Page 17 to 21 (Sections: Discussion)
32	Clarity of minor themes
